# Supplementary material for: Variability in firearm injury among major pediatric trauma centers across the USA
Source: HighWire-hosted journal article supplement (doi:10.1136/tsaco-2022-001014), 2023-05-01
Supplement: tsaco-2022-001014supp001_data_supplement.pdf [file tsaco-2022-001014supp001_data_supplement.pdf]

## Supplemental 1

| Mechanism | ICD-9                                                                                                                              |
|-----------|------------------------------------------------------------------------------------------------------------------------------------|
| Firearm   | E922.0-3, E922.8, E922.9-.9,<br>E965.0-.4<br>E955.0, E955.1, E955.2,<br>E955.3, E955.4                                             |
| MVC       | E958.5, E968.5, E810.0-810.1<br>811.0-811.1, E812.0-E812.1<br>E813.0-E813.1, E815.0-<br>E815.1<br>E816.0-E816.1, E819.0-<br>E819.1 |
